# Supplementary material for: DICER1-associated metastatic abdominopelvic primitive neuroectodermal tumor with an EWSR1 rearrangement in a 16-yr-old female
Source: PubMed Central journal article supplement — Cold Spring Harb Mol Case Stud. 2020 Oct;6(5):a005603. doi: 10.1101/mcs.a005603 (PMC7552927; doi:10.1101/mcs.a005603), 2020-10
Supplement: supp_mcs.a005603_Supplemental_Table_S1.pdf [file supp_mcs.a005603_Supplemental_Table_S1.pdf]

**Supplemental Table S1.** Genes Evaluated in PGDx Cancer Select-203 Assay

| Sequence and Copy Number (*) Analyses |         |         |        |         | Sequence and Copy Number (*) Analysis (continued) |         |         |         |         |
|---------------------------------------|---------|---------|--------|---------|---------------------------------------------------|---------|---------|---------|---------|
| ABL1*                                 | BUB1B   | DNMT3A* | FANCG  | IDH1*   | MTOR                                              | NPM1    | POT1    | SDHAF2  | TET2    |
| AVCR1                                 | CALR    | EGFR*   | FANCI  | IDH2*   | MUTYH                                             | NRAS*   | PRKAR1A | SDHB    | TGFBR2  |
| AKT1*                                 | CBL*    | EP300   | FANCL  | IGF1R*  | MYC*                                              | NTRK1   | PRSS1   | SDHC    | TNFAIP3 |
| AKT2*                                 | CCND1*  | ERBB2*  | FANCM  | IGF2R*  | MYCL1*                                            | PALB2   | PTCH1   | SDHD    | TOP1    |
| ALK*                                  | CCNE1*  | ERBB3*  | FBXW7  | IKZF1   | MYCN*                                             | PAX5*   | PTEN    | SF3B1*  | TP53    |
| APC                                   | CDC73   | ERBB4*  | FGFR1  | JAK1*   | MYD88*                                            | PBRM1   | PTPN11* | SMAD2   | TSC1    |
| AR*                                   | CDH1    | ERCC1   | FGFR2* | JAK2*   | NBN                                               | PDGFRA* | RAD51C  | SMAD3   | TSC2    |
| ARID1A                                | CDK4*   | ERCC2   | FGFR3* | JAK3*   | NCOA3*                                            | PHOX2B  | RAF1    | SMAD4   | TSHR*   |
| ARID1B                                | CDK6*   | ERCC3   | FGFR4* | KDR*    | NF1                                               | PIK3CA* | RB1     | SMARCB1 | VHL     |
| ASXL1                                 | CDKN1B  | ERCC4   | FH     | KIT*    | NF2                                               | PIK3R1  | RECQL4  | SMO*    | WAS     |
| ATM                                   | CDKN2A  | ERCC5   | FLCN   | KRAS*   | NKX2-1*                                           | PMS1    | RET*    | SRC     | WRN     |
| ATRX                                  | CDKN2B  | ESR1    | FLT3*  | MAML1*  | NOTCH1*                                           | PMS2    | RNF43   | STAG2   | WT1     |
| AURKA                                 | CDKN2C  | ETV1    | FLT4   | MAP2K1* | NOTCH2*                                           | POLD1   | ROS1    | STK11   | XPA     |
| AXIN2                                 | CEBPA   | ETV5    | FOXL2* | MAP2K4  | NOTCH3*                                           | POLE    | RUNX1*  | SUFU    | XPC     |
| BAP1                                  | CHEK2   | EWSR1   | GATA1  | MDM2*   | NOTCH4*                                           | POLH    | SDBS    | TERT    | XRCC1   |
| BCL2*                                 | CIC     | EXT1    | GATA2* | MDM4*   | <b>Rearrangement Analyses</b>                     |         |         |         |         |
| BCR                                   | CREBBP  | EXT2    | GNA11* | MED12*  | ALK                                               | EGFR    | EWSR1   | PDGFRA  | RET     |
| BLM                                   | CSF1R*  | EZH2*   | GNAQ*  | MEN1    | BCL2                                              | ETV1    | FGFR3   | PDGFRB  | ROS1    |
| BMPR1A                                | CTNNB1* | FANCA   | GNAS*  | MET*    | BCR                                               | ETV4    | MLL     | PRKACA  | TACC3   |
| BRAF*                                 | CYLD    | FANCB   | GPC3   | MLH1    | BRAF                                              | ETV5    | MYC     | RAF1    | TMPRSS2 |
| BRCA1                                 | DAXX    | FANCC   | H3F3A* | MLL*    | DNAJB1                                            | ETV6    | NTRK1   | RARA    |         |
| BRCA2                                 | DDB2    | FANCD2  | H3F3B  | MPL*    | <b>Microsatellite Analyses</b>                    |         |         |         |         |
| BRIP1                                 | DDR2    | FANCE   | HNF1A  | MSH2    | BAT-25                                            | BAT-26  | NR-21   | NR-24   | MONO-27 |
| BTK                                   | DICER1  | FANCF   | HRAS*  | MSH6    |                                                   |         |         |         |         |
